# Supplementary material
Source: publisher site journal article supplement (https://www.dovepress.com/article/401003)
Supplement: Supplementary file 1 [file get_supplementary_file.php]

## Supplemental Tables

**Supplemental Table S1.** Differences in TBSA classification between administrative claims and medical records

| TBSA categories from administrative claims       | Actual TBSA from medical records |       |
|--------------------------------------------------|----------------------------------|-------|
|                                                  | < 10%                            | ≥ 10% |
| Third-degree burn with TBSA < 10%, n             | 29                               | 21    |
| Third-degree burn with TBSA 10%–19%, n           | ≤ 10                             | 37    |
| Third-degree burn with TBSA ≥ 20%, n             | ≤ 10                             | 48    |
| Third-degree burn with unspecified TBSA, n       | 46                               | ≤ 10  |
| First-, second-, or unspecified burn severity, n | ≤ 10                             | ≤ 10  |

TBSA, total body surface area.

**Supplemental Table S2.** Physical and occupational therapy data during the follow-up period obtained from administrative claims by %TBSA cohorts

| Characteristics                             |                                                                                                                            | %TBSA Cohorts         |                             |                          | P value <sup>1</sup> |                   |                      |
|---------------------------------------------|----------------------------------------------------------------------------------------------------------------------------|-----------------------|-----------------------------|--------------------------|----------------------|-------------------|----------------------|
|                                             |                                                                                                                            | Minor<br>( $< 10\%$ ) | Moderate<br>( $10\%–24\%$ ) | Major<br>( $\geq 25\%$ ) | Minor vs<br>Moderate | Minor vs<br>Major | Moderate<br>vs Major |
| <b>From Administrative Claims</b>           |                                                                                                                            |                       |                             |                          |                      |                   |                      |
| Physical<br>therapy visits <sup>2</sup>     | $\geq 1$ physical therapy visit,<br>n (%)                                                                                  | 49 (54.4)             | 44 (58.7)                   | 28 (80.0)                | 0.638                | 0.008             | 0.033                |
|                                             | Number of physical therapy<br>visits for patients with $\geq 1$<br>physical therapy visit,<br>mean (SD), median            | 7.6 (7.37), 5         | 10.2 (10.85), 7             | 19.9 (21.14),<br>12.5    | 0.126                | $< 0.001$         | 0.010                |
| Occupational<br>therapy visits <sup>2</sup> | $\geq 1$ occupational therapy<br>visit, n (%)                                                                              | 33 (36.7)             | 35 (46.7)                   | 26 (74.3)                | 0.207                | $< 0.001$         | 0.008                |
|                                             | Number of occupational<br>therapy visits for patients<br>with $\geq 1$ occupational<br>therapy visit, mean (SD),<br>median | 4.9 (4.65), 4         | 8.6 (10.13), 5              | 11.7 (8.86), 12          | 0.135                | 0.003             | 0.126                |

Hahn H, Yu TC, Teng CC, Tan H. Holistic view of autografting patients by percentage of total body surface area burned: medical record abstraction integrated with administrative claims.

<sup>1</sup>*P* values were calculated from Chi-squared tests for categorical variables, Fisher exact tests for flag variables, and *t* tests or Wilcoxon tests for continuous variables;

Bonferroni corrected alpha = 0.017.

<sup>2</sup>Physical and occupational therapies were in an outpatient setting.

%TBSA, percentage of total body surface area; SD, standard deviation.
